# Supplementary material for: Novel Mutations of the SPI1 Gene in a Chinese Girl with Agammaglobulinemia
Source: Research Square preprint supplement (doi:10.21203/rs.3.rs-7538129/v1), 2025-09-26
Supplement: Supplementary file 1 [file 3bbd121833bb6a4c93bdbd69.docx]

Supplemental Table 1. Clinical characteristics of autoimmune-related markers( n=1).

| **Parameters** | **Measured values** | **Normal range** |
| --- | --- | --- |
| Antinuclear antibodies | Negative | Negative |
| Titration of antinuclear antibodies | Negative | Negative |
| Anti-nRNP antibody | Negative | Negative |
| Anti-Smith antibody | Negative | Negative |
| Sjogren's syndrome-A/52 | Negative | Negative |
| Sjogren's syndrome-A/60 | Negative | Negative |
| Sjogren's syndrome-B | Negative | Negative |
| Resistant to Scl-70 | Negative | Negative |
| Resistant to Jo-1 | Negative | Negative |
| Anti-centromere B antibody | Negative | Negative |
| Anti-dsDNA | Negative | Negative |
| Anti-nucleosome antibodies | Negative | Negative |
| Anti-histone antibody | Negative | Negative |
| Anti-ribosomal P protein antibody | Negative | Negative |
| Perinuclear ANCA(pANCA) | Negative | Negative |
| Cytoplasmic ANCA(cANCA) | Negative | Negative |
| Anti-myeloperoxidase antibody IgG | Negative | Negative |
| Protease 3 antibody IgG | Negative | Negative |
| Anti-glomerular basement membrane antibody IgG | Negative | Negative |
| antinuclear antibodies | Negative | Negative |

Supplemental Table 2. Targeted sequencing of multiple respiratory pathogens (alveolar lavage fluid) .

| **Parameters** | **Uniform Sequence Number** | **Estimated concentration of microorganisms**  **(copies/mL)** | **Pathogenicity**  **Classification** |
| --- | --- | --- | --- |
| Haemophilus influenzae | 16769 | >1.0x10^6 | A |
| Candida albicans | 2004 | 1.1x10^3 | B |
| Rhinovirus A | 11296 | >1.0x10^6 | A |
| Human adenovirus B3 | 742 | 1.9x10^4 | A |

Supplemental Table 3. Targeted sequencing of multiple respiratory pathogens (sputum) .

| **Parameters** | **Uniform Sequence Number** | **Estimated concentration of microorganisms**  **(copies/mL)** | **Pathogenicity**  **Classification** |
| --- | --- | --- | --- |
| Haemophilus influenzae | 48188 | >1.0x10^6 | A |
| Staphylococcus aureus | 78 | <1.0x10^3 | A |
| Candida albicans | 155 | <1.0 x10^3 | B |
| Rhinovirus A | 1874 | 5.6 x10^3 | A |
| Human adenovirus 5 | 195 | 1.0 x10^4 | A |

Supplemental Table 4. X-linked genetic characteristics of agammaglobulinemia patients across different countries.

| Country | Turkey[1, 2] | Malaysia[3, 4] | India[5, 6] | China[7-15] | Vietnam[16] | American[17, 18] | Brazil[19] | Iran[20] | Slovakia[21, 22] | Italy[23] | New Zealand[24] |
| --- | --- | --- | --- | --- | --- | --- | --- | --- | --- | --- | --- |
| X-linked | c.226 G>T(p.Glu76Te) ;  c.1289 A>G(p.Lys430Arg);  c.36 G>C(p.Lys12Asn);  c.1563 C>A(p.Asp521Glu);  c.1835 A>C(p.Gln612Pro);  c.1684 C>T(p.Arg562Trp);  c.493 T>G(p.Cys165Gly);  c.83 G>A(p.Arg28His);  c.83 G>A(p.Arg28His);  c.1573 C>G(p.Arg525Gly);  c.337 G>A(p.Val113Ile);  c.763 C>T(p.Arg255Ter);  c.36 G>C(p.Lys12Asn);  c.1383 T>G(p.Try461Ter);  c.226 G>T(p.Glu76Ter);  c.790C > T(p.Gln264Ter); | c.589_894del;  c.1103_1129del;  c.1103_1115del;  c.1102_1103ins[NG_009616.1:g.33472_33639;GG;  c.1181C>A;  c.1559G>T; | chrX:100,624,323–100,629, 619；  c.158_159insG;  c.1325_1326insT;  c.164dupC;  IVS6-1C>T:c.392-1G>A;  c.518_518delG;  c.513_513delG;  c.233_234delAG;  c.1646_1650delATGAA;  c.1104 A>G;  c.1325dupT(p.F442fsX2); | c.83G>A;  c.G1574C:p.R525P>A;  c.854G＞C(p.Arg285Pro);  c.185G＞A;  ChrX:IVS17:c.1750+2T>G Hemi;  chrX:100617547;  c.1333G＞T;NM_000061.2:  c.1430T>A,p.(Met477Lys);  c.504G>T[p.K168N];  c.895-2A>G [p.Del K290 fs 23];  c.910T>G [p.F304V];  c.1132T>C [p.T334H];  c.1562A>T[p.D521V];  c.1957delG [Del p.D653 fs plus 45 a.a.;  c.1900 T > G;  c.897delG;  c.1751-6_1755delttctagGGGTT;  ChX:101367539_101376531;   c.240G > A;  c.902_c.904delAAG/p.E301del;  c.64C > G;  c.1349 + 5G > A;  c.1684C>T; IVS8+2T>C; c.298C>T; IVS3-2A>G;  c.164T>A;  c.204C>G;  c.913C>T;  c.824G>A; | c.441G>A;  c.1770delG;  c.1742delG;  c.1249A >T; | c.1899C>T (p.Cys633Cys);  c.226G>T (p.Glu76*);  c.1573C>G (p.Arg525Gly);  c.1289A>G (p.Lys430Arg);  c.36G>C (p.Lys12Asn);  c.1563C>A (p.Asp521Glu);  c.1835A>C (p.Gln612Pro);  c.1684C>T (p.Arg562Trp);  c.493T>G (p.Cys165Gly);  c.83G>A (p.Arg28His);  c.83G>A (p.Arg28His);  c.1573C>G (p.Arg525Gly);  c.337G>A (p.Val113Ile);  c.763C>T (p.Arg255*);  c.493T>G (p.Cys165Gly);  c.1980+119A>C (c.*119A>C);  c.36G>C (p.Lys12Asn);  c.1383T>G (p.Tyr461*);  c.226G>T (p.Glu76*);  c.1492C > G; | c.1751G>A  (p.Gly584Glu) | c.428A>T, p.His143Leu;  1896G>A;  IVS12+1G>A;  2084A>G;  1783T>C | p.W124C (g.51465G>C, p.Trp124Cys);  c.1843C>T; | c.1555T p.H519Y | c.1691G > A;  c.1906_1908GAG > TTT;  c.1581_1584delTTTG， C527fsX528  1567-2A > C(IVS15-2A > C)  776 + 1G > A(IVS8 + 1G > A) |

**Reference**

[1]. Yildirim, I., et al., Erratum: X-linked agammaglobulinemia: investigation of clinical and laboratory findings, novel gene mutations and prevention of infective complications in long-term follow-up. Am J Clin Exp Immunol, 2021. 10(2): p. 63-64.

[2]. Topyildiz, E., et al., A Novel BLNK Gene Mutation in a Four-Year-Old Child Who Presented with Late Onset of Severe Infections and High IgM Levels and Diagnosed and Followed as X-Linked Agammaglobulinemia for Two Years. Case Reports Immunol, 2022. 2022: p. 7313009.

[3]. Chear, C.T., et al., Clinical features and mutational analysis of X-linked agammaglobulinemia patients in Malaysia. Front Immunol, 2023. 14: p. 1252765.

[4]. Jain, A., et al., Whole genome sequencing identifies novel structural variant in a large Indian family affected with X-linked agammaglobulinemia. PLoS One, 2021. 16(7): p. e0254407.

[5]. Rawat, A., et al., Clinical and Genetic Profile of X-Linked Agammaglobulinemia: A Multicenter Experience From India. Front Immunol, 2020. 11: p. 612323.

[6]. Rawat, A., et al., Case Report: Whole exome sequencing identifies a novel frameshift insertion c.1325dupT (p.F442fsX2) in the tyrosine kinase domain of BTK gene in a young Indian individual with X-linked agammaglobulinemia. F1000Res, 2016. 5: p. 2667.

[7]. Lu X Y, et al. X-linked agammaglobulinemia caused by BTK gene mutation: A report of 2 cases. National Medical Journal of China, 2023, 103(19): 1504-1506.

[8]. Deng Y H, et al. Diagnosis of X-linked severe combined immunodeficiency in the neonatal period: A case report. Chinese Journal of Neonatology (Chinese & English Edition), 2024, 39(8): 494-496.

[9]. Yeh, Y.H., et al., Distinct Clinical Features and Novel Mutations in Taiwanese Patients With X-Linked Agammaglobulinemia. Front Immunol, 2020. 11: p. 2001.

[10]. Zhou, Q., et al., Identification of four novel mutations in BTK from six Chinese families with X-linked agammaglobulinemia. Clin Chim Acta, 2022. 531: p. 48-55.

[11]. Song, Y., et al., IgA nephropathy in a child with X-linked agammaglobulinemia: a case report. BMC Pediatrics, 2024. 24(1).

[12]. Hu, X.M., et al., Novel deletion mutation in Bruton's tyrosine kinase results in X-linked agammaglobulinemia: A case report. World J Clin Cases, 2020. 8(17): p. 3859-3866.

[13]. Yang, Y., et al., Identification by whole-exome sequencing of novel mutation c.64C > G in the BTK gene of a fetus with X-linked agammaglobulinemia. Ultrasound in obstetrics & gynecology: the official journal of the International Society of Ultrasound in Obstetrics and Gynecology, 2015. 45(6): p. 753-754.

[14]. Zhang, Y.N., et al., Delayed diagnosis of X-linked agammaglobulinaemia in a boy with recurrent meningitis. BMC Neurol, 2019. 19(1): p. 320.

[15]. Wang J C, Liu X X. Clinical features and gene mutation analysis of 7 children with primary immunodeficiency diseases. Chinese Journal of Contemporary Pediatrics, 2018, 20(4): 285-289.

[16]. Vu, Q.V., et al., Clinical and mutational features of Vietnamese children with X-linked agammaglobulinemia. BMC Pediatr, 2014. 14: p. 129.

[17]. Yildirim, I., et al., X-linked agammaglobulinemia: investigation of clinical and laboratory findings, novel gene mutations and prevention of infective complications in long-term follow-up. Am J Clin Exp Immunol, 2021. 10(1): p. 37-43.

[18]. Kalkat, A., O. Humpel and R. Hostoffer, Novel BTK Mutation in Patient with Late Diagnosis of X-Linked Agammaglobulinemia. Case Reports Immunol, 2023. 2023: p. 6698913.

[19]. Francisco, J.R., et al., Clinical and genetic findings in two siblings with X-Linked agammaglobulinemia and bronchiolitis obliterans: a case report. BMC Pediatr, 2022. 22(1): p. 181.

[20]. Aghamohammadi, A., et al., Screening of the Bruton Tyrosine Kinase (BTK) Gene Mutations in 13 Iranian Patients with Presumed X-Linked Agammaglobulinemia. Iran J Allergy Asthma Immunol, 2004. 3(4): p. 175-9.

[21]. Havlicekova, Z., et al., X-linked agammaglobulinemia caused by new mutation in BTK gene: a case report. Biomed Pap Med Fac Univ Palacky Olomouc Czech Repub, 2014. 158(3): p. 470-3.

[22]. Markocsy, A., et al., Atypical Manifestation of X-linked Agammaglobulinemia - the Importance of Genetic Testing. Acta Medica (Hradec Kralove), 2024. 67(2): p. 60-63.

[23]. Riccardi, N., et al., Pseudomonas aeruginosa severe skin infection in a toddler with X-linked agammaglobulinemia due to a novel BTK mutation. Infez Med, 2019. 27(1): p. 73-76.

[24]. Woon, S.T. and R. Ameratunga, Comprehensive genetic testing for primary immunodeficiency disorders in a tertiary hospital: 10-year experience in Auckland, New Zealand. Allergy Asthma Clin Immunol, 2016. 12: p. 65.
